# Supplementary material for: In vitro inhibitory effects of plant-derived by-products against Cryptosporidium parvum
Source: PubMed Central journal article supplement (PMC5028040; doi:10.1051/parasite/2016050), 2016-09-14
Supplement: parasite-23-41-s1.pdf [file parasite-23-41-s1.pdf]

**SUPPLEMENTARY MATERIAL**

**Table S1.** Anticryptosporidial activity of plant by-products *in vitro*.

Results from *in vitro* testing of 42 samples derived from 18 different plant by-products, four samples related to olives, and monensin sodium salt against *C. parvum*. MIC<sub>100</sub> indicates the minimal concentration of a sample, at which complete parasite inhibition was observed ( $\mu\text{g mL}^{-1}$  for solid samples, nL mL<sup>-1</sup> for the oleuropein extract or nM for monensin). Samples which were active in the first trial were tested in three independent trials in total, whereas the others were not tested again. Four samples related to olives were tested in two trials, monensin in three. MCC<sub>75</sub> is the minimal cytotoxic concentration against HCT-8 host cells (< 75% host cell viability). Inhibitory concentrations within the non-toxic range for host cells are marked by **bold print**.

| Abbreviation | MIC <sub>100</sub> |                  |            | MCC <sub>75</sub> |         |         |
|--------------|--------------------|------------------|------------|-------------------|---------|---------|
|              | Trial 1            | Trial 2          | Trial 3    | Trial 1           | Trial 2 | Trial 3 |
| AHW          | <b>500</b>         | 1000             | 1000       | 1000              | 1000    | 1000    |
| CFE          | > 1000             |                  |            | > 1000            |         |         |
| CFW          | > 1000             |                  |            | > 1000            |         |         |
| CPE          | > 1000             |                  |            | > 1000            |         |         |
| CPH          | > 1000             |                  |            | > 1000            |         |         |
| CPW          | > 1000             |                  |            | > 1000            |         |         |
| CSE          | > 1000             |                  |            | > 1000            |         |         |
| CSW          | > 1000             |                  |            | > 1000            |         |         |
| DCE          | > 1000             |                  |            | > 1000            |         |         |
| DCW          | > 1000             |                  |            | > 1000            |         |         |
| EPE          | > 500              |                  |            | > 500             |         |         |
| EPH          | > 1000             |                  |            | > 1000            |         |         |
| EPW          | > 1000             |                  |            | > 1000            |         |         |
| HAE          | > 1000             |                  |            | > 1000            |         |         |
| HAW          | > 1000             |                  |            | > 1000            |         |         |
| LDE          | > 1000             |                  |            | 1000              |         |         |
| LDH          | > 1000             |                  |            | > 1000            |         |         |
| LDW          | > 1000             |                  |            | > 1000            |         |         |
| LEE          | > 1000             |                  |            | > 1000            |         |         |
| LEW          | > 1000             |                  |            | > 1000            |         |         |
| LUE          | > 1000             |                  |            | > 1000            |         |         |
| LUW          | > 1000             |                  |            | > 1000            |         |         |
| MIE          | > 1000             |                  |            | > 1000            |         |         |
| MIW          | > 1000             |                  |            | > 1000            |         |         |
| OEE          | <b>250</b>         | <b>500</b>       | <b>500</b> | > 1000            | > 1000  | > 1000  |
| OEW          | > 1000             |                  |            | > 1000            |         |         |
| SAE          | <b>500</b>         | <b>250 - 500</b> | > 500      | > 1000            | > 500   | > 500   |
| SAH          | <b>1000</b>        | <b>500</b>       | > 500      | > 1000            | > 500   | > 500   |
| SAW          | > 1000             |                  |            | > 1000            |         |         |
| SIE          | <b>250 – 500</b>   | <b>125 - 500</b> | > 500      | > 500             | > 500   | 500     |
| SIH          | <b>250</b>         | > 500            | > 500      | > 500             | > 500   | > 500   |
| SIW          | > 1000             |                  |            | > 1000            |         |         |
| SRCE         | > 1000             |                  |            | > 1000            |         |         |
| SRCH         | > 1000             |                  |            | 1000              |         |         |
| SRCW         | > 1000             |                  |            | > 1000            |         |         |

| Abbreviation                     | MIC <sub>100</sub> |                    |            | MCC <sub>75</sub> |         |         |
|----------------------------------|--------------------|--------------------|------------|-------------------|---------|---------|
|                                  | Trial 1            | Trial 2            | Trial 3    | Trial 1           | Trial 2 | Trial 3 |
| SRH                              | > 1000             |                    |            | > 1000            |         |         |
| TVE                              | 1000               |                    |            | 1000              |         |         |
| TVH                              | > 1000             |                    |            | > 1000            |         |         |
| TVW                              | > 1000             |                    |            | > 1000            |         |         |
| VME                              | > 500              |                    |            | > 500             |         |         |
| VMW                              | > 1000             |                    |            | > 1000            |         |         |
| VVW                              | <b>500</b>         | 1000               | 1000       | 1000              | 1000    | 1000    |
| <i>Samples related to olives</i> |                    |                    |            |                   |         |         |
| Hydroxytyrosol                   | > 1000             | > 1000             |            | > 1000            | > 1000  |         |
| Tyrosol                          | > 250              | > 250              |            | > 250             | > 250   |         |
| Coniferyl alcohol                | > 250              | > 250              |            | 250               | > 250   |         |
| Oleuropein extract               | > 1000             | > 1000             |            | > 1000            | > 1000  |         |
| Monensin sodium                  | <b>16.7</b>        | <b>16.7 - 33.4</b> | <b>8.3</b> | > 133.5           | > 133.5 | > 133.5 |
